# Supplementary material for: Nanocellulose from fractionated sulfite wood pulp
Source: Springer Nature journal article supplement (doi:10.1007/s10570-020-03428-8), 2020-09-15
Supplement: MOESM1 [file 18378842]

Supplementary


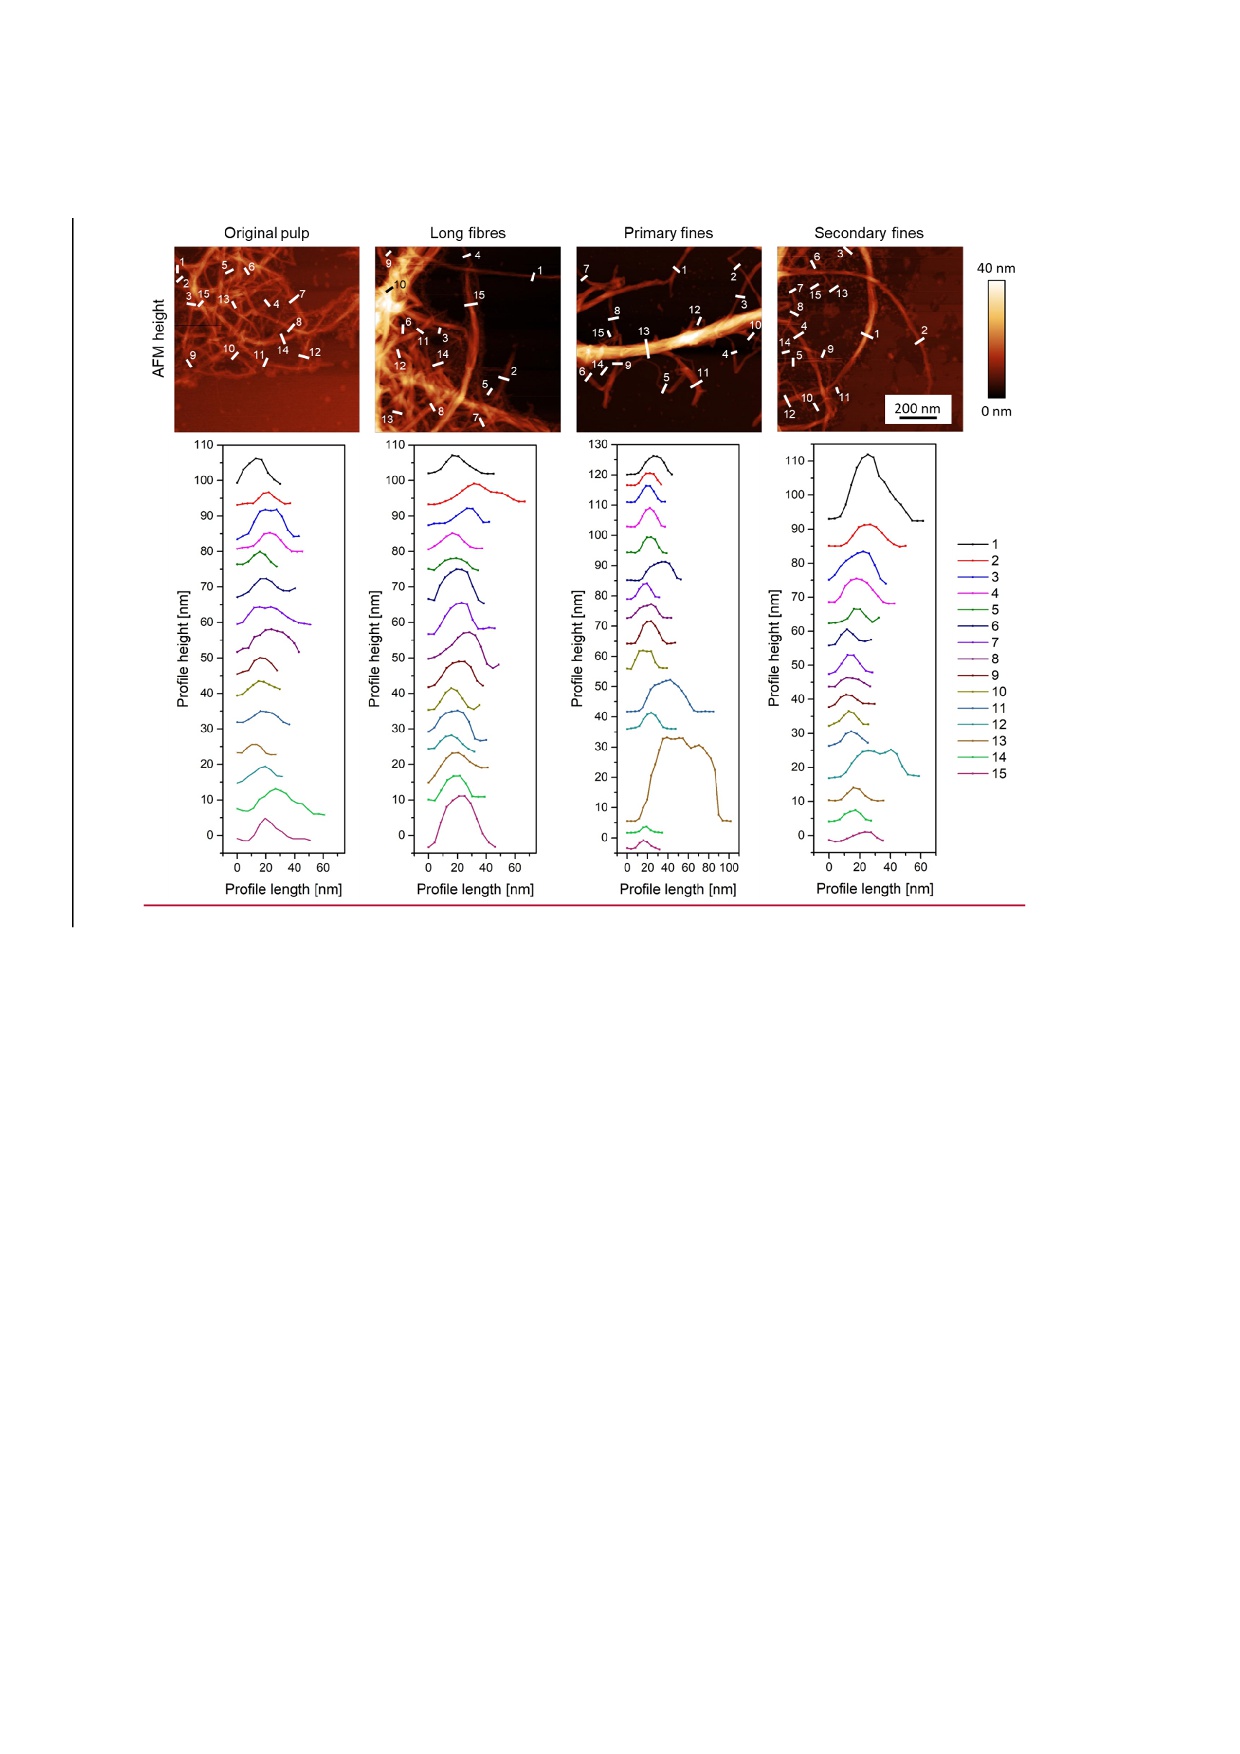


Figure 7 – AFM height images showed the nano-structure of the different pulp and fine sections (top row). 15 profiles of each AFM height image were extracted with Gwyddion software and revealed the size distributions of the fibres/fines (bottom row).
